# Supplementary material
Source: ML conference proceedings conference paper supplement (https://aclanthology.org/2020.emnlp-demos.13)
Supplement: OptionalSupplementaryMaterial [file 2020.emnlp-demos.13.OptionalSupplementaryMaterial.zip]

## A Experimental Settings

### A.1 Dataset

**TECHQA** (Castelli et al., 2020). It is to stimulate transfer learning research to address non-factoid questions and long solution documents. The dataset is recently released with a competition leaderboard. The TECHQA dataset contains actual questions posed by users on the IBM Developer and IBM DeveloperWorks forums as well as a collection of IBM Technotes.

**StackExchange** Stack Exchange<sup>2</sup> is a network of QA websites composed by multiple communities. In our experiments, we choose two popular technical communities: AskUbuntu<sup>3</sup> and StackUnix<sup>4</sup>.

### A.2 Evaluation Metrics

As a standard retrieval task, our models are evaluated on retrieving and ranking answers for given

questions using two metrics: mean reciprocal rank (MRR) and recall at  $K$  ( $R@K$ ).  $R@K$  is the percentage of correct answers in top  $K$  out of all the relevant answers. MRR represents the average of the reciprocal ranks of results for a set of queries.

## B Implementation Details

We use lite-BERT (ALBERT) as a pre-trained language model, which takes a maximum 384 input token sequence. For model fine tuning, we use AdamW (Kingma and Ba, 2014) with learning rate of  $5.5\text{e-}6$ ,  $\beta_1 = 0.9$ ,  $\beta_2 = 0.999$ , L2 weight decay of 0.01, learning rate warm up over the first 10,000 steps, and linear decay of learning rate. Our models are trained with a single-card V100 GPU, and deployed on PyTorch with Flask web framework.

---

<sup>2</sup><https://stackexchange.com/>

<sup>3</sup><https://askubuntu.com/>

<sup>4</sup><https://unix.stackexchange.com/>

| Dataset                | #Instance | #Answer* | #Train | #Valid | #Vocab | Q.Length | A.Length |
|------------------------|-----------|----------|--------|--------|--------|----------|----------|
| AskUbuntu              | 30419     | 10951    | 7222   | 3729   | 33420  | 58.4     | 44.9     |
| TechQA                 | 750       | 607      | 450    | 157    | 7485   | 46.3     | 58.6     |
| StackUnix              | 1394      | 1394     | 1115   | 279    | 7072   | 51.0     | 37.7     |
| Internal $\mathcal{D}$ | 3256      | 3256     | 2148   | 1108   | 19189  | 61.9     | 36.8     |

Table 4: Statistics of three technical QA dataset.

| Methods        |    | Source<br>QAs | Source<br>Corpus | IBM Internal Dataset $\mathcal{D}$ |              |              |              |
|----------------|----|---------------|------------------|------------------------------------|--------------|--------------|--------------|
|                |    |               |                  | MRR                                | R@1          | R@5          | R@10         |
| SASE<br>(LSTM) | M1 | -             | -                | 8.65                               | 4.87         | 11.64        | 15.97        |
|                | M2 | ✓             | -                | 10.58                              | 6.98         | 13.25        | 17.95        |
|                | M3 | -             | ✓                | 14.69                              | 9.56         | 24.50        | 30.45        |
|                | M4 | ✓             | ✓                | <b>18.61</b>                       | <b>13.26</b> | <b>28.16</b> | <b>35.65</b> |
| ALBERT         | M1 | -             | -                | 19.44                              | 12.81        | 25.27        | 32.85        |
|                | M2 | ✓             | -                | 22.47                              | 14.00        | 30.42        | 39.10        |
|                | M3 | -             | ✓                | 19.64                              | 11.46        | 26.53        | 35.20        |
|                | M4 | ✓             | ✓                | <b>24.85</b>                       | <b>16.60</b> | <b>32.58</b> | <b>41.78</b> |

Table 5: Results on an IBM internal technical dataset  $\mathcal{D}$ .
